# Supplementary material for: Benchmarking DFT approaches for the calculation of polarizability inputs for refractive index predictions in organic polymers
Source: Royal Society of Chemistry journal article supplement (doi:10.1039/c8cp05492d), 2019-01-01
Supplement: c8cp05492d1.xlsx [file c8cp05492d1.xlsx]

## Sheet: Title and authors
Benchmarking DFT Approaches for the Calculation of Polarizability Inputs for Refractive Index Predictions in Organic Polymers

## Sheet: Polarizability values
Functional -->	BP86		B3LYP		PBE0		TPSSh		M062X		B2PLYP		Monomer SMILES
Basis set -->	DZ	TZ	DZ	TZ	DZ	TZ	DZ	TZ	DZ	TZ	DZ	TZ
poly(ethylene)	23.0176	25.3952	22.4744	24.7209	22.333	24.5332	22.4919	24.6901	22.4485	24.3562	21.9198	23.9635	CC
poly(acrylic acid)	38.2168	42.4794	36.9338	40.6954	36.3165	40.312	36.9433	41.3456	35.7225	40.8004	34.5725	39.3969	CC(C(=O)O)
poly(methyl acrylate)	50.2734	57.3055	48.8407	53.7522	48.3886	54.1488	49.307	53.557	47.6538	52.7318	45.7861	50.2678	C(C(=O)OC)C
poly(ethyl acrylate)	61.5428	69.2626	58.9057	65.0027	59.0689	65.3217	59.7584	67.2513	59.7942	65.2022	56.387	63.3766	C(C(=O)OCC)C
poly(vinyl alcohol)	26.7578	29.6846	26.0622	29.0214	25.5442	28.389	25.8431	28.7398	25.6527	28.5274	24.6119	27.358	C(O)C
poly(vinyl chloride)	31.861	37.0723	30.7088	36.2549	30.7157	35.7171	30.929	36.0678	30.6035	35.704	29.747	34.6901	C(Cl)C
poly(acrylonitrile)	34.1884	38.2093	33.1033	37.0623	33.1201	36.9465	33.2442	37.5103	32.8444	36.8028	32.1499	35.9564	C(C#N)C
poly(vinyl acetate)	50.472	56.3657	47.3723	53.0899	47.6872	52.9683	48.4808	53.5901	47.4093	52.128	45.4418	50.6177	C(OC(=O)C)C
poly(styrene)	83.5344	92.7894	81.7212	94.2277	83.9147	89.3421	85.1185	92.0015	82.9624	87.8279	81.4383	88.195	C(c1ccccc1)C
poly(2-chlorostyrene)	97.4659	106.074	92.7169	108.77	92.5654	103.176	95.0105	108.578	90.164	102.232	90.7506	102.183	C(c1c(Cl)cccc1)C
poly(2-methylstyrene)	98.7177	109.3	93.3374	103.356	95.6334	102.339	98.6909	107.306	94.3232	100.585	94.4191	101.174	C(c1c(C)cccc1)C
poly(propylene)	34.977	38.0764	33.6642	37.156	33.5235	36.7808	33.947	36.906	33.8437	36.582	32.9761	35.5191	C(C)C
poly(ethoxyethylene)	50.8126	55.7967	48.7369	53.7253	48.2034	54.1959	49.2072	53.6945	47.5521	54.095	46.4565	51.6845	C(OCC)C
poly(n-butyl acrylate)	86.9862	97.4616	82.1878	92.9362	83.6337	87.6773	82.3819	90.3998	81.3555	89.7561	78.3971	85.1614	C(C(=O)OCCCC)C
poly(vinyl hexyl ether)	110.221	120.246	107.037	111.273	104.109	111.612	107.345	121.88	129.059	113.518	99.3214	110.187	C(C(=O)OCCCCCC)C
poly(1,1-dimethylethylene)	46.226	50.4741	44.6969	48.6393	44.5618	48.2897	44.8555	48.8093	44.8955	48.2486	43.1428	47.0526	C(C)(C)C
poly(methyl methacrylate)	62.4511	68.8956	59.8236	65.2318	58.8587	65.3781	62.2567	66.9998	60.1511	63.9831	58.0654	62.8773	C(C)(C(=O)OC)C
poly(ethyl methacrylate)	73.8369	84.0642	73.0101	78.7247	71.3763	83.3935	71.1272	78.0984	71.6528	77.2027	66.9554	73.4665	C(C)(C(=O)OCC)C
poly(isopropyl methacrylate)	89.749	96.1653	82.3803	90.616	82.2195	90.3554	81.6633	88.2129	82.0609	87.9439	79.1203	87.5967	C(C)(C(=O)OC(C)C)C
poly(2-chloroethyl methacrylate)	81.7371	94.7057	79.6017	91.6253	77.331	87.442	78.954	89.3819	78.0056	88.6862	75.7437	86.3004	C(C)(C(=O)OCCCl)C
poly(phenyl methacrylate)	116.063	119.002	111.999	123.268	116.729	121.608	112.645	121.092	110.755	120.732	106.415	118.083	C(C)(C(=O)Oc1ccccc1)C
poly(chlorotrifluoroethylene)	31.994	39.079	30.163	36.813	30.7043	36.9394	30.8846	37.4599	30.2495	37.0174	29.4708	35.6877	C(Cl)(F)C(F)(F)
poly(oxymethylene)	15.0171	17.2361	14.1564	16.3808	14.0804	16.3949	14.3439	16.566	13.8861	15.7535	13.5808	15.5064	CO
poly(oxyethylene)	27.686	31.3469	26.3521	29.9284	26.8001	29.8419	27.0205	30.0515	26.3802	29.5046	25.4518	28.3869	CCO
poly(ε-caprolactam)	77.4409	89.5835	76.2881	84.3182	75.4426	83.2582	77.4725	83.1127	75.3844	82.8185	72.0356	77.013	C(=O)CCCCCN
poly(ethylene terephthalate)	124.323	136.795	120.436	127.532	111.346	129.042	120.149	130.235	114.484	123.12	114.006	130.441	COC(=O)c1ccccc1C(=O)OC
poly(vinyl n-octyl ether)	123.573	139.75	117.119	126.906	117.903	127.171	120.677	127.168	122.078	126.922	144.261	119.918	CC(OCCCCCCCC)
poly(vinyl n-decyl ether)	99.6978	160.668	140.857	154.449	138.854	153.33	141.918	152.249	139.184	154.228	133.273	152.912	CC(OCCCCCCCCCC)
poly(vinyl n-pentyl ether)	85.8722	95.5617	85.3399	92.1138	82.2245	92.5044	85.7059	92.9183	82.525	92.4014	80.7124	85.902	CC(OCCCCC)
poly(vinyl 2-ethylhexyl ether)	121.74	139.483	85.4603	128.876	118.38	124.993	115.744	131.431	117.305	124.756	113.917	120.359	CC(OCC(CC)CCCC)
poly(vinyl n-butyl ether)	72.7417	81.3857	71.4891	78.5361	72.1441	80.8188	72.6519	80.3037	73.4798	77.0394	70.4379	74.9256	CC(OCCCC)
poly(vinyl isobutyl ether)	76.1036	81.2298	70.4665	80.3841	70.8699	77.8831	72.0676	78.2293	71.9122	76.285	69.5131	74.063	CC(OCC(C)(C))
poly(vinyl sec-butyl ether)	85.7235	93.3511	93.2686	90.9342	83.1092	89.1777	81.8873	89.1258	84.3689	91.3406	78.1249	86.9953	CC(OCC(C)(CC))
poly(isobutyl methacrylate)	96.7515	107.57	94.2558	102.124	93.8231	104.051	95.1842	106.548	128.232	102.375	90.2825	99.3854	CC(C)(C(=O)OCC(C)(C))
poly(n-hexyl methacrylate)	122.902	138.723	117.48	127.91	116.376	127.136	120.33	129.271	115.847	123.351	111.409	114.689	CC(C)(C(=O)OCCCCCC)
poly(n-butyl methacrylate)	68.9514	109.492	93.9968	103.612	94.08	102.105	94.9674	102.141	95.6889	99.3313	89.2017	100.265	CC(C)(C(=O)OCCCC)
poly(4-methyl-1-pentene)	70.3429	76.1853	68.2067	73.825	67.8637	73.6243	67.7101	74.9473	68.2717	73.0522	65.3147	71.5264	CC(CC(C)C)
poly(vinyl chloroacetate)	58.8056	67.8673	55.8614	64.3413	56.9481	63.8129	57.4187	65.1492	55.0161	64.4598	53.9717	62.3495	CC(OC(=O)CCl)
poly(n-propyl methacrylate)	85.7214	101.553	84.4937	90.2197	80.7386	88.7408	83.6695	89.1681	81.9492	91.7574	80.4164	84.8847	CC(C)(C(=O)OCCC)
poly(vinyl butyral)	73.2058	80.3155	71.5274	79.7571	69.7167	76.5151	71.1721	79.5668	69.1891	77.0528	71.6596	75.1052	C(OC(=O)CCC)C
poly(vinyl benzoate)	104.061	117.284	102.039	109.787	103.099	108.313	99.7721	111.887	100.978	109.266	96.7473	104.788	C(OC(=O)c1ccccc1)C
poly(N-vinylpyrrolidone)	72.4962	82.6265	71.0905	78.3449	72.482	78.925	74.0429	77.6645	70.491	77.2951	67.7756	73.1912	C(N1C(=O)CCC1)C
poly(vinylidene fluoride)	21.8672	25.0742	20.9928	23.9568	20.8888	23.9195	21.2659	24.3175	20.8616	23.7877	20.0767	22.8716	C(F)(F)C
poly(trifluoroethyl acrylate)	60.655	69.9342	58.0423	66.6794	58.5214	66.9428	58.9883	67.8481	57.3386	66.474	55.8757	63.6663	C(C(=O)OCC(F)(F)(F))C
poly(2,2,2-trifluoro-1-methylethyl?methacrylate)	86.4307	96.6182	81.6643	94.2231	80.3727	90.5702	84.8529	91.5646	79.9556	91.2915	77.7586	86.5071	C(C)(C(=O)OC(C)C(F)(F)(F))C
poly(trifluoroethyl methacrylate)	74.2283	82.9347	71.0218	78.9256	68.3406	78.6011	71.0162	79.5178	68.9007	78.6652	67.0701	75.5134	C(C)(C(=O)OCC(F)(F)(F))C
poly(N-vinylcarbazole)	161.446	182.169	160.757	177.19	156.716	173.296	157.225	180.23	155.763	171.777	155.119	166.932	C(n1c2c(cccc2)c2c1(cccc2))C
poly(α-vinylnaphthalene)	133.474	148.733	135.449	146.118	128.491	143.165	130.854	143.125	128.93	144.562	128.734	138.573	C(c1cccc2ccccc12)C
poly(styrene sulfide)	102.211	116.785	101.203	111.536	96.0522	110.508	98.9823	113.152	98.3	111.164	98.5197	108.497	C(S)C(c1ccccc1)
poly(pentabromophenyl methacrylate)	187.412	209.133	193.194	215.499	189.95	213.838	190.617	208.097	181.607	197.263	172.926	203.102	C(C)(c1c(Br)c(Br)c(Br)c(Br)c1(Br))C
poly(phenyl α-bromoacrylate)	119.168	131.545	117.21	142.201	118.418	128.727	118.932	135.554	114.711	130.281	112.629	120.15	C(Br)(C(=O)Oc1ccccc1)C
poly(chloro-p-xylylene)	97.165	113.879	94.804	108.711	93.793	107.833	103.02	114.53	97.7949	108.525	94.4109	109.105	Cc1c(Cl)cc(cc1)C
poly(β-naphthyl methacrylate)	170.946	175.16	163.847	187.447	190.491	187.188	167.109	174.349	148.877	172.664	160.051	175.362	C(C)(C(=O)Oc1ccc2ccccc2c1)C
poly(sec-butyl α-bromoacrylate)	102.485	115.538	95.7533	110.446	100.326	110.748	100.398	109.736	97.4476	109.032	94.5676	105.656	C(Br)(C(=O)OC(C)(CC))C
poly(2-bromoethyl ethacrylate)	98.8889	112.529	99.3991	110.107	105.171	108.262	102.969	109.832	97.2157	109.231	92.1972	102.707	C(CC)(C(=O)OCC(Br))C
poly(benzyl methacrylate)	122.051	141.756	118.159	131.815	115.086	133.11	117.253	133.57	117.233	130.891	114.152	124.165	C(C)(C(=O)OCc1ccccc1)C
poly(propylene oxide)	38.6015	43.3781	37.8451	41.9336	36.4776	41.7781	37.6612	42.344	37.4792	40.6135	34.9892	40.0897	OC(C)C
poly(3-hexoxypropylene oxide)	111.2	126.484	109.413	120.502	111.235	119.91	108.949	122.258	109.154	120.739	102.546	112.713	OC(COCCCCCC)C
poly(4-fluoro-2-trifluoromethylstyrene)	101.876	112.783	95.8506	105.937	94.6923	105.182	93.8609	107.511	96.7362	105.387	93.6565	103.982	C(c1c(F)cc(C(F)(F)(F))cc1)C
poly(propylene sulfide)	54.7159	61.8078	52.2574	57.5203	52.6434	55.4913	53.0475	59.0263	52.0878	57.2697	51.3655	55.9625	SC(C)C
poly(p-bromophenyl methacrylate)	136.087	160.257	136.767	143.717	132.042	147.743	135.681	152.427	134.476	141.681	139.859	142.12	C(C)(C(=O)Oc1ccc(Br)cc1)C
poly(N-benzyl methacrylamide)	130.718	145.476	124.761	143.456	127.357	137.585	128.049	136.751	124.548	136.691	124.049	136.5	C(C)(C(=O)NCc1ccccc1)C
poly(trifluorovinyl acetate)	49.9048	58.115	46.9101	54.026	46.2844	53.9886	46.9392	55.831	45.6931	52.8703	44.3555	51.9169	C(F)(F)C(F)(OC(=O)C)
poly(tert-butyl-methacrylate)	98.8058	109.42	92.8232	105.495	91.4392	103.541	92.9498	104.3	92.093	100.283	90.241	101.058	C(C)(C(=O)OC(C)(C)(C))C
poly(vinyl methyl ether)	38.178	43.3725	36.8032	41.3307	37.1004	40.985	37.4218	41.3978	37.0547	40.4113	35.7312	38.9169	C(OC)C
poly(3,3,5-trimethylcyclohexyl methacrylate)	151.125	167.319	145.472	159.398	146.079	157.336	147.426	161.166	145.605	157.411	139.869	153.519	C(C)(C(=O)OC1CC(C)(C)CCC1(C))C
poly(3-methylcyclohexyl methacrylate)	127.813	141.583	122.934	136.225	122.029	135.049	125.517	136.095	122.413	133.883	118.938	127.441	C(C)(C(=O)OC1CC(C)CCC1)C
poly(4-methylcyclohexyl methacrylate)	132.8	140.043	123.645	134.103	122.295	133.725	122.915	139.007	123.728	132.959	119.021	128.63	C(C)(C(=O)OC1CCC(C)CC1)C
poly(ethyl α-chloroacrylate)	69.7287	85.2686	67.2605	78.2779	67.943	76.7287	69.4599	77.5308	67.2253	78.0997	65.1516	74.466	C(Cl)(C(=O)OCC)C
poly(methyl α-chloroacrylate)	59.5978	67.6248	56.7368	65.3432	56.9279	64.5283	56.8485	66.7123	55.7098	64.6713	54.6585	62.4347	C(Cl)(C(=O)OC)C
poly(1,3-dichloropropyl methacrylate)	103.85	118.841	99.7054	113.694	97.6358	112.79	98.3748	114.262	98.1672	111.926	95.7612	109.278	C(C)(C(=O)OC(Cl)CC(Cl))C
poly(cyclohexyl α-bromoacrylate)	122.335	134.185	113.909	129.95	118.865	129.293	117.756	130.469	114.583	127.929	112.61	124.968	C(Br)(C(=O)OC1CCCCC1)C
poly(1-phenylethyl methacrylate)	135.322	149.327	133.682	142.16	132.028	145.085	136.197	145.742	127.86	143.285	125.567	135.289	C(C)(C(=O)OC(c1ccccc1)C)C
poly(o-chlorobenzyl methacrylate)	134.154	148.596	157.839	143.318	119.677	144.665	130.362	144.59	127.648	141.254	125.234	140.864	C(C)(C(=O)OCc1c(Cl)cccc1)C
poly(o-methoxystyrene)	102.753	114.497	100.551	110.107	100.39	108.877	101.88	111.216	99.2704	107.359	96.4153	106.023	C(c1c(OC)cccc1)C
poly(p-methoxystyrene)	105.993	119.458	104.402	112.389	104.468	110.46	101.766	103.978	103.476	107.11	100.505	110.447	C(c1ccc(OC)cc1)C
poly(cyclohexyl α-chloroacrylate)	104.189	114.697	98.6787	109.892	97.7972	109.793	99.6488	111.238	97.9287	107.951	95.0647	104.502	C(Cl)(C(=O)OC1CCCCC1)
poly(vinyl methyl ketone)	46.5607	52.4278	44.288	50.4759	44.3237	49.1016	44.9	49.9477	44.0925	49.5563	42.9611	48.1895	CC(=O)CC
polyoxytetrafluoroethylene	22.1795	27.0571	21.4243	25.7628	21.3331	25.6193	21.7538	26.1433	21.0026	25.3475	20.175	24.431	C(F)(F)C(F)(F)
poly(ethylene adipate)	98.8816	112.893	94.9046	105.825	93.8935	107.843	99.1595	109.071	94.3769	104.606	91.3153	105.445	OCCOC(=O)CCCCC(=O)
polyisobutylene	46.0329	50.3948	44.7053	48.5963	44.5572	48.4345	44.7074	48.962	44.9217	48.3686	43.2455	46.9347	C(C)(C)C
polymethacrylonitrile	45.0056	49.6926	43.6549	48.3704	43.9551	48.2831	44.2667	48.3008	43.5916	47.7405	42.7937	46.7997	C(C#N)(C)C
polyisoprene	55.4947	64.6043	58.7462	63.4651	57.5421	63.5744	58.1697	63.13	57.3449	62.4326	54.7032	60.3469	CC=C(C)C
polypropylene	35.0461	38.1927	33.9393	37.0941	33.5215	36.8311	33.8711	37.129	34.6028	36.6065	32.619	35.47	C(C)C
poly(diphenylmethyl methacrylate)	195.124	206.125	181.619	198.775	184.419	197.859	182.289	200.665	179.749	196.218	176.936	193.895	CC(C)(C(=O)OC(c1ccccc1)(c1ccccc1)
poly(vinyl n-dodecyl ether)	168.36	170.606	166.68	180.861	163.016	178.668	163.968	187.12	162.827	181.361	155.44	172.602	CC(OCCCCCCCCCCCC)
poly(vinyl n-pentyl ether)	85.9132	94.6635	83.9347	90.2406	87.8418	89.8745	82.6547	88.9563	83.3441	105.805	82.0013	87.2873	CC(OCCCCC)
poly(hexyl methacrylate)	119.789	135.365	117.602	126.764	116.154	127.222	114.899	137.018	114.586	121.124	108.525	124.094	C(C)(C(=O)CCCCCC)C
polystyrene	85.3163	90.6884	84.4527	91.4938	83.4334	88.8464	84.3759	93.146	82.9229	91.4395	81.2886	88.2059	C(c1ccccc1)C
polychloroprene	58.9597	62.567	53.903	62.3343	54.5871	60.7887	55.7252	62.6253	55.285	61.2759	53.7732	60.7041	CC(Cl)=CC
poly(oxyethylene)	27.6068	30.8218	26.4437	28.5322	26.3266	30.2339	26.1018	29.8222	26.2937	28.1854	25.1199	27.6407	OCC
poly(vinyl propionate)	63.0124	67.7701	58.4826	66.2166	59.5098	65.1858	59.7527	66.824	59.2721	64.2729	56.6558	64.7283	CC(OC(=O)CC)
poly(2-ethoxyethyl methacrylate)	103.214	124.275	109.965	121.801	106.852	119.822	112.142	119.815	109.072	117.901	103.091	115.22	CC(C)(C(=O)OCCCOCC)
poly(vinyl n-octyl ether)	122.117	160.995	118.568	130.777	122.136	130.394	118.054	129.335	117.41	140.952	115.136	119.601	CC(OCCCCCCCC)
poly(ethyl methacrylate)	74.0126	83.0234	70.4507	77.5722	71.1066	76.0697	72.3868	80.0081	71.0425	81.3383	69.0836	74.2587	CC(C)(C(=O)OCC)
poly(hexamethylene adipamite)	172.151	181.74	154.821	171.494	163.348	165.335	156.494	175.151	177.177	166.558	143.354	162.324	C(=O)CCCCC(=O)NCCCCCCN
poly(vinyl n-hexyl ether)	98.1929	108.975	95.6353	102.439	95.2583	102.843	97.0856	103.875	96.2974	100.507	91.5094	99.4702	CC(OCCCCCC)
poly(diethyl fumarate)	102.485	119.251	97.4967	106.733	98.812	105.109	100.041	108.135	97.6722	107.9	101.009	100.584	CC(C(=O)OCC)(C(=O)OCC)
poly(dipropyl fumarate)	131.404	140.844	127.505	131.208	120.568	132.141	132.978	135.946	117.385	131.06	114.976	122.162	CC(C(=O)OCCC)(C(=O)OCCC)
poly(4-bromostyrene)	103.254	120.987	103.086	118.158	104.98	117.11	102.208	116.025	101.966	116.248	100.582	113.941	C(c1ccc(Br)cc1)C
poly(4-chlorostyrene)	97.5361	105.767	92.4884	110.108	96.07	110.244	96.4607	104.793	90.6274	101.324	89.9172	98.3069	C(c1ccc(Cl)cc1)C
poly(4-fluorostyrene)	86.9541	94.5044	84.8326	91.1118	83.3354	88.4556	82.5207	92.687	80.6664	91.7247	81.5157	89.6364	C(c1ccc(F)cc1)C
poly(phenyl methacrylate)	119.348	125.058	109.987	114.105	109.811	121.704	114.494	123.337	109.213	120.201	105.946	119.28	CC(C)(C(=O)Oc1ccccc1)
poly(vinyl chloroacetate)	57.9647	67.3914	62.2065	65.3643	55.7457	63.7335	56.7519	64.9793	54.9868	63.3726	53.3823	61.6494	CC(OC(=O)CCl)
poly(methyl acrylate)	50.2026	56.4993	48.5114	54.0239	48.2714	53.9652	48.7939	54.4691	47.3759	53.6468	45.2241	51.5366	C(C(=O)OC)C
poly(vinylidene Chloride)	40.9818	49.3786	39.4185	47.6968	39.6729	47.4554	40.0851	47.9207	39.2153	47.2544	38.2582	46.1081	CC(Cl)(Cl)
poly(cyclohexyl methacrylate)	116.899	126.861	112.692	121.725	111.062	120.778	116.369	123.358	112.129	120.725	107.354	116.247	C(C)(C(=O)OC1CCCCC1)C
poly(ethylene teraphthalate)	124.686	144.078	122.24	133.076	120.396	132.094	121.913	136.918	129.296	127.406	112.543	126.842	OC(=O)c1ccccc1C(=O)OCC
poly(p-cyclohexylphenyl methacrylate)	204.369	217.977	193.975	200.877	187.214	203.387	196.725	207.857	218.951	213.362	186.451	202.124	CC(C)(C(=O)Oc1ccc(cc1)C1CCCCCC1)
poly(2-ethylhexyl ether)	103.184	106.948	95.7881	101.385	93.2271	104.452	93.3089	105.915	93.7333	100.375	92.1591	98.2784	OCC(CC)CCCC
poly(p-xylylene)	88.5968	95.2935	88.6214	95.2801	90.6336	96.7751	86.2352	93.8806	85.5127	96.7706	86.2326	91.7813	Cc1ccc(cc1)C
poly(N-butylmethacrylamide)	104.787	115.215	97.9828	109.757	96.9619	108.985	101.569	116.384	97.6717	107.391	94.0391	102.011	C(C)(C(=O)NCCCC)C

## Sheet: RI values
Functional	BP86		B3LYP		PBE0		TPSSh		M062X		B2PLYP		Experiment RI
Basis set	DZ	TZ	DZ	TZ	DZ	TZ	DZ	TZ	DZ	TZ	DZ	TZ
CC	1.4338	1.4863	1.4222	1.4712	1.4191	1.467	1.4225	1.4705	1.4216	1.4631	1.4103	1.4545	1.476
CC(C(=O)O)	1.4701	1.5326	1.4518	1.5061	1.4431	1.5005	1.452	1.5157	1.4348	1.5077	1.4188	1.4871	1.527
C(C(=O)OC)C	1.433	1.5043	1.4189	1.4678	1.4145	1.4718	1.4235	1.4658	1.4074	1.4575	1.3894	1.4329	1.479
C(C(=O)OCC)C	1.4285	1.4915	1.4077	1.4564	1.4089	1.459	1.4144	1.4748	1.4147	1.458	1.388	1.4432	1.4685
C(O)C	1.425	1.4792	1.4124	1.4667	1.4032	1.455	1.4085	1.4615	1.4051	1.4575	1.3866	1.436	1.5
C(Cl)C	1.4413	1.527	1.423	1.5132	1.4231	1.5042	1.4265	1.51	1.4214	1.5039	1.408	1.4871	1.539
C(C#N)C	1.4808	1.5487	1.4631	1.529	1.4633	1.527	1.4654	1.5367	1.4589	1.5246	1.4477	1.5102	1.52
C(OC(=O)C)C	1.435	1.4945	1.4046	1.4611	1.4077	1.4599	1.4154	1.4662	1.405	1.4514	1.3861	1.4364	1.467
C(c1ccccc1)C	1.5424	1.6168	1.5283	1.6288	1.5454	1.5886	1.5549	1.6103	1.538	1.5764	1.5262	1.5794	1.592
C(c1c(Cl)cccc1)C	1.553	1.6134	1.5208	1.6329	1.5198	1.5928	1.5363	1.6315	1.5038	1.5861	1.5077	1.5858	1.6098
C(c1c(C)cccc1)C	1.5568	1.6312	1.5206	1.5889	1.5359	1.5818	1.5566	1.6168	1.5271	1.5696	1.5278	1.5737	1.5874
C(C)C	1.4412	1.487	1.4223	1.4732	1.4203	1.4677	1.4263	1.4695	1.4249	1.4647	1.4125	1.4491	1.4735
C(OCC)C	1.4302	1.4794	1.4102	1.4587	1.4051	1.4634	1.4147	1.4584	1.3989	1.4624	1.3886	1.4387	1.454
C(C(=O)OCCCC)C	1.4607	1.5266	1.4315	1.4977	1.4402	1.4649	1.4327	1.4818	1.4265	1.4778	1.4089	1.4495	1.466
C(C(=O)OCCCCCC)C	1.4261	1.4712	1.4121	1.4308	1.3994	1.4323	1.4135	1.4787	1.5121	1.4408	1.3787	1.426	1.4591
C(C)(C)C	1.4726	1.5242	1.4545	1.5017	1.4529	1.4974	1.4563	1.5037	1.4568	1.4969	1.4363	1.4825	1.505
C(C)(C(=O)OC)C	1.4567	1.5125	1.4346	1.4805	1.4266	1.4818	1.4551	1.4958	1.4374	1.4698	1.4201	1.4604	1.4893
C(C)(C(=O)OCC)C	1.4532	1.5279	1.4474	1.4884	1.4359	1.5229	1.4341	1.4838	1.4378	1.4774	1.4052	1.4506	1.485
C(C)(C(=O)OC(C)C)C	1.4535	1.4915	1.4111	1.4586	1.4102	1.4571	1.407	1.4446	1.4093	1.443	1.3927	1.441	1.4728
C(C)(C(=O)OCCCl)C	1.4541	1.5402	1.4404	1.5192	1.4261	1.4913	1.4363	1.5042	1.4303	1.4995	1.4161	1.4838	1.517
C(C)(C(=O)Oc1ccccc1)C	1.5594	1.5766	1.5358	1.6022	1.5633	1.5922	1.5395	1.5891	1.5287	1.5869	1.5042	1.5712	1.5706
C(Cl)(F)C(F)(F)	1.3485	1.4366	1.3265	1.4079	1.333	1.4094	1.3352	1.416	1.3276	1.4104	1.3183	1.3938	1.39
CO	1.4388	1.5155	1.4102	1.4854	1.4077	1.4859	1.4164	1.4919	1.4013	1.4638	1.3914	1.4554	1.48
CCO	1.442	1.511	1.4177	1.4838	1.4258	1.4822	1.4298	1.4862	1.4182	1.4758	1.4015	1.4549	1.4563
C(=O)CCCCCN	1.4654	1.553	1.4573	1.5143	1.4515	1.5066	1.4656	1.5056	1.4511	1.5035	1.4281	1.4624	1.53
COC(=O)c1ccccc1C(=O)OC	1.5471	1.615	1.5266	1.5642	1.48	1.5724	1.5251	1.5788	1.4959	1.5407	1.4935	1.58	1.575
CC(OCCCCCCCC)	1.4519	1.5221	1.4249	1.4661	1.4281	1.4672	1.4397	1.4672	1.4456	1.4661	1.5423	1.4365	1.4613
CC(OCCCCCCCCCC)	1.2853	1.4873	1.4185	1.4653	1.4117	1.4614	1.4221	1.4576	1.4128	1.4645	1.393	1.4599	1.4628
CC(OCCCCC)	1.4284	1.4849	1.4254	1.4645	1.4077	1.4668	1.4275	1.4692	1.4094	1.4662	1.3992	1.4286	1.459
CC(OCC(CC)CCCC)	1.4401	1.5159	1.2966	1.4701	1.4262	1.4537	1.4154	1.481	1.4217	1.4527	1.4079	1.4343	1.4626
CC(OCCCC)	1.418	1.4758	1.4098	1.4565	1.4141	1.4719	1.4174	1.4684	1.4228	1.4464	1.403	1.4324	1.4563
CC(OCC(C)(C))	1.441	1.4757	1.4039	1.4699	1.4066	1.453	1.4144	1.4553	1.4134	1.4422	1.3978	1.4275	1.4507
CC(OCC(C)(CC))	1.4286	1.4729	1.4725	1.4587	1.4137	1.4485	1.4068	1.4482	1.4208	1.4611	1.3857	1.4359	1.474
CC(C)(C(=O)OCC(C)(C))	1.4416	1.4997	1.4286	1.4701	1.4263	1.4805	1.4334	1.4941	1.6181	1.4715	1.408	1.4555	1.477
CC(C)(C(=O)OCCCCCC)	1.4599	1.5304	1.4365	1.4818	1.4318	1.4784	1.4488	1.4878	1.4296	1.4618	1.4109	1.4247	1.4813
CC(C)(C(=O)OCCCC)	1.3074	1.5193	1.4345	1.4865	1.435	1.4782	1.4397	1.4784	1.4435	1.4631	1.4093	1.4682	1.483
CC(CC(C)C)	1.4371	1.4795	1.422	1.4622	1.4195	1.4608	1.4184	1.4704	1.4224	1.4566	1.4017	1.4456	1.465
CC(OC(=O)CCl)	1.4406	1.521	1.4154	1.4892	1.4247	1.4844	1.4287	1.4964	1.4083	1.4902	1.3995	1.4715	1.513
CC(C)(C(=O)OCCC)	1.4425	1.54	1.4352	1.4695	1.4132	1.4605	1.4303	1.4631	1.4202	1.4788	1.4113	1.4375	1.484
C(OC(=O)CCC)C	1.441	1.4912	1.4294	1.4872	1.417	1.4642	1.427	1.4859	1.4135	1.468	1.4304	1.4543	1.485
C(OC(=O)c1ccccc1)C	1.5281	1.6109	1.5159	1.5633	1.5223	1.5542	1.5024	1.5765	1.5095	1.5601	1.4845	1.5325	1.5775
C(N1C(=O)CCC1)C	1.4751	1.555	1.4644	1.5207	1.475	1.5253	1.487	1.5153	1.4599	1.5124	1.4395	1.4805	1.53
C(F)(F)C	1.374	1.4367	1.3573	1.4145	1.3553	1.4138	1.3625	1.4217	1.3548	1.4112	1.3401	1.3933	1.42
C(C(=O)OCC(F)(F)(F))C	1.3687	1.4331	1.3511	1.4102	1.3543	1.4121	1.3574	1.4184	1.3464	1.4088	1.3366	1.3893	1.407
C(C)(C(=O)OC(C)C(F)(F)(F))C	1.3734	1.4235	1.3505	1.4116	1.3444	1.3936	1.3658	1.3984	1.3424	1.3971	1.3321	1.3738	1.4185
C(C)(C(=O)OCC(F)(F)(F))C	1.3975	1.4512	1.3782	1.4262	1.3623	1.4242	1.3782	1.4299	1.3656	1.4246	1.3548	1.4053	1.437
C(n1c2c(cccc2)c2c1(cccc2))C	1.6556	1.7671	1.6521	1.7394	1.6315	1.7181	1.6341	1.7562	1.6267	1.7099	1.6235	1.6842	1.683
C(c1cccc2ccccc12)C	1.6041	1.6926	1.6152	1.677	1.5765	1.6596	1.5895	1.6593	1.5789	1.6678	1.5778	1.633	1.6818
C(S)C(c1ccccc1)	1.591	1.6991	1.5839	1.6591	1.5479	1.6514	1.5683	1.6713	1.5635	1.6563	1.565	1.6365	1.6568
C(C)(c1c(Br)c(Br)c(Br)c(Br)c1(Br))C	1.62	1.7129	1.6441	1.7415	1.6305	1.734	1.6333	1.7083	1.5963	1.6613	1.5616	1.6864	1.71
C(Br)(C(=O)Oc1ccccc1)C	1.5531	1.6245	1.5422	1.6893	1.5489	1.6079	1.5518	1.6485	1.5284	1.617	1.5169	1.5586	1.612
Cc1c(Cl)cc(cc1)C	1.5523	1.6726	1.5362	1.6342	1.5294	1.6278	1.5932	1.6775	1.5567	1.6328	1.5335	1.6371	1.629
C(C)(C(=O)Oc1ccc2ccccc2c1)C	1.5743	1.5917	1.5455	1.6438	1.657	1.6427	1.5587	1.5883	1.4868	1.5814	1.5304	1.5925	1.6298
C(Br)(C(=O)OC(C)(CC))C	1.4745	1.547	1.4386	1.5183	1.4629	1.52	1.4633	1.5143	1.4476	1.5104	1.4324	1.4918	1.542
C(CC)(C(=O)OCC(Br))C	1.4552	1.53	1.458	1.5164	1.4891	1.5061	1.4772	1.5149	1.4463	1.5115	1.42	1.4757	1.5426
C(C)(C(=O)OCc1ccccc1)C	1.5214	1.6257	1.5017	1.572	1.4864	1.5789	1.4971	1.5813	1.497	1.5671	1.4817	1.5322	1.5679
OC(C)C	1.4146	1.4743	1.4054	1.456	1.3889	1.454	1.4032	1.4611	1.401	1.4394	1.3711	1.4329	1.457
OC(COCCCCCC)C	1.4282	1.4973	1.4204	1.4698	1.4284	1.4672	1.4183	1.4778	1.4192	1.4709	1.3906	1.4349	1.459
C(c1c(F)cc(C(F)(F)(F))cc1)C	1.477	1.538	1.4444	1.4994	1.4382	1.4952	1.4338	1.5082	1.4491	1.4963	1.4327	1.4885	1.46
SC(C)C	1.5559	1.6462	1.526	1.5909	1.5307	1.5655	1.5355	1.61	1.524	1.5877	1.5153	1.5713	1.596
C(C)(C(=O)Oc1ccc(Br)cc1)C	1.5732	1.7039	1.5767	1.6131	1.5526	1.6346	1.5712	1.6601	1.565	1.6023	1.5928	1.6046	1.5964
C(C)(C(=O)NCc1ccccc1)C	1.5534	1.6312	1.5232	1.6203	1.5363	1.589	1.5398	1.5846	1.5222	1.5843	1.5197	1.5833	1.5965
C(F)(F)C(F)(OC(=O)C)	1.353	1.4189	1.3296	1.3857	1.3248	1.3854	1.3299	1.4003	1.3203	1.3764	1.31	1.3689	1.375
C(C)(C(=O)OC(C)(C)(C))C	1.4427	1.4986	1.4121	1.4776	1.4052	1.4673	1.4128	1.4713	1.4084	1.4503	1.3992	1.4543	1.4638
C(OC)C	1.4319	1.501	1.4142	1.4734	1.418	1.4688	1.4221	1.4743	1.4174	1.4612	1.4005	1.4415	1.467
C(C)(C(=O)OC1CC(C)(C)CCC1(C))C	1.4607	1.5193	1.4409	1.4903	1.443	1.4829	1.4477	1.4967	1.4413	1.4832	1.4215	1.4692	1.485
C(C)(C(=O)OC1CC(C)CCC1)C	1.4594	1.5181	1.4392	1.4949	1.4355	1.4899	1.4499	1.4944	1.4371	1.485	1.4229	1.4579	1.4947
C(C)(C(=O)OC1CCC(C)CC1)C	1.4804	1.5114	1.4421	1.4859	1.4366	1.4843	1.4391	1.5069	1.4425	1.481	1.4232	1.4628	1.4975
C(Cl)(C(=O)OCC)C	1.4388	1.5562	1.4211	1.5021	1.426	1.4904	1.4369	1.4965	1.4208	1.5008	1.4061	1.4735	1.502
C(Cl)(C(=O)OC)C	1.4474	1.5188	1.4229	1.4981	1.4245	1.4908	1.4238	1.5105	1.4141	1.4921	1.4053	1.4722	1.517
C(C)(C(=O)OC(Cl)CC(Cl))C	1.4758	1.5586	1.4538	1.5296	1.443	1.5246	1.4468	1.5328	1.4458	1.5198	1.4332	1.5052	1.527
C(Br)(C(=O)OC1CCCCC1)C	1.4993	1.5577	1.4593	1.5365	1.4827	1.5333	1.4774	1.5391	1.4625	1.5265	1.4533	1.5121	1.542
C(C)(C(=O)OC(c1ccccc1)C)C	1.5113	1.5756	1.5039	1.5423	1.4966	1.5558	1.5152	1.5588	1.4782	1.5474	1.4682	1.5111	1.5487
C(C)(C(=O)OCc1c(Cl)cccc1)C	1.5204	1.5889	1.6347	1.5634	1.4551	1.5699	1.503	1.5695	1.4907	1.5536	1.4798	1.5518	1.5823
C(c1c(OC)cccc1)C	1.5529	1.6316	1.5387	1.6016	1.5376	1.5934	1.5472	1.6091	1.5304	1.5832	1.5123	1.5743	1.5932
C(c1ccc(OC)cc1)C	1.5741	1.6664	1.5637	1.6171	1.5641	1.604	1.5465	1.5609	1.5576	1.5815	1.5384	1.6039	1.5967
C(Cl)(C(=O)OC1CCCCC1)	1.4704	1.5269	1.4417	1.5008	1.4372	1.5002	1.4467	1.508	1.4379	1.4904	1.4232	1.4721	1.532
CC(=O)CC	1.467	1.5373	1.4407	1.5135	1.4412	1.497	1.4478	1.5071	1.4385	1.5025	1.4256	1.4862	1.5
C(F)(F)C(F)(F)	1.2873	1.3573	1.2768	1.3384	1.2755	1.3363	1.2814	1.3439	1.2709	1.3324	1.2594	1.3192	1.35
OCCOC(=O)CCCCC(=O)	1.4367	1.5098	1.4167	1.4724	1.4117	1.483	1.4382	1.4894	1.4141	1.4661	1.3989	1.4705	1.47
C(C)(C)C	1.4703	1.5232	1.4545	1.5011	1.4528	1.4992	1.4546	1.5056	1.4571	1.4984	1.4375	1.481	1.505
C(C#N)(C)C	1.4628	1.52	1.4468	1.5036	1.4503	1.5026	1.454	1.5028	1.446	1.4959	1.4367	1.4844	1.52
CC=C(C)C	1.4627	1.5539	1.4945	1.5421	1.4826	1.5433	1.4888	1.5387	1.4807	1.5316	1.455	1.5105	1.521
C(C)C	1.4422	1.4887	1.4262	1.4723	1.4202	1.4684	1.4253	1.4728	1.4358	1.4651	1.4074	1.4484	1.4735
CC(C)(C(=O)OC(c1ccccc1)(c1ccccc1)	1.5894	1.6309	1.5402	1.603	1.5503	1.5996	1.5426	1.6101	1.5335	1.5935	1.5236	1.5848	1.5993
CC(OCCCCCCCCCCCC)	1.4422	1.449	1.4371	1.4805	1.4261	1.4737	1.4289	1.5001	1.4255	1.4821	1.4036	1.4551	1.464
CC(OCCCCC)	1.4286	1.4795	1.4174	1.4536	1.4397	1.4515	1.4101	1.4461	1.414	1.5473	1.4065	1.4365	1.459
C(C)(C(=O)CCCCCC)C	1.4476	1.5165	1.4382	1.478	1.432	1.4801	1.4267	1.524	1.4254	1.4534	1.3999	1.4663	1.48
C(c1ccccc1)C	1.5564	1.5996	1.5496	1.6062	1.5416	1.5846	1.549	1.6198	1.5377	1.6057	1.525	1.5795	1.592
CC(Cl)=CC	1.5316	1.5711	1.4781	1.5685	1.4852	1.5515	1.4971	1.5718	1.4925	1.5568	1.4767	1.5505	1.558
OCC	1.4405	1.5009	1.4193	1.4576	1.4172	1.4896	1.4132	1.4818	1.4166	1.4512	1.3956	1.4411	1.4563
CC(OC(=O)CC)	1.4403	1.4791	1.4043	1.4663	1.4124	1.4579	1.4143	1.4713	1.4105	1.4505	1.3901	1.4542	1.4665
CC(C)(C(=O)OCCCOCC)	1.4024	1.4986	1.4325	1.4869	1.4185	1.4777	1.4424	1.4777	1.4285	1.4688	1.4018	1.4564	1.5
CC(OCCCCCCCC)	1.4458	1.6203	1.4309	1.4827	1.4458	1.4811	1.4288	1.4765	1.4261	1.5275	1.4167	1.4352	1.4613
CC(C)(C(=O)OCC)	1.4545	1.5201	1.4294	1.48	1.434	1.4692	1.443	1.4978	1.4335	1.5076	1.4199	1.4562	1.485
C(=O)CCCCC(=O)NCCCCCCN	1.5194	1.5543	1.4586	1.5171	1.4882	1.4952	1.4643	1.5303	1.5376	1.4995	1.4197	1.4846	1.53
CC(OCCCCCC)	1.4413	1.4982	1.4281	1.4634	1.4262	1.4655	1.4355	1.471	1.4315	1.4533	1.4071	1.4479	1.4591
CC(C(=O)OCC)(C(=O)OCC)	1.4587	1.5486	1.433	1.4809	1.4397	1.4724	1.446	1.4883	1.4339	1.4871	1.451	1.4488	1.48
CC(C(=O)OCCC)(C(=O)OCCC)	1.48	1.521	1.4634	1.4792	1.4344	1.4832	1.4867	1.4996	1.4213	1.4785	1.4115	1.4411	1.48
C(c1ccc(Br)cc1)C	1.5292	1.6427	1.5282	1.6239	1.5398	1.617	1.5228	1.6099	1.5213	1.6114	1.5129	1.5964	1.62
C(c1ccc(Cl)cc1)C	1.5535	1.6112	1.5193	1.6427	1.5435	1.6437	1.5461	1.6042	1.5069	1.5797	1.5022	1.5588	1.6
C(c1ccc(F)cc1)C	1.5301	1.5863	1.5147	1.5607	1.5039	1.541	1.4981	1.5725	1.485	1.5653	1.491	1.5498	1.56
CC(C)(C(=O)Oc1ccccc1)	1.5787	1.613	1.5243	1.548	1.5233	1.5927	1.5502	1.6026	1.5199	1.5838	1.5015	1.5783	1.5706
CC(OC(=O)CCl)	1.4334	1.5167	1.4702	1.4983	1.4144	1.4837	1.423	1.4949	1.408	1.4805	1.3946	1.4653	1.513
C(C(=O)OC)C	1.4323	1.4959	1.4157	1.4706	1.4134	1.47	1.4185	1.4751	1.4047	1.4667	1.384	1.4455	1.479
CC(Cl)(Cl)	1.4752	1.594	1.4542	1.5694	1.4576	1.5659	1.4631	1.5726	1.4515	1.5629	1.4388	1.5465	1.6
C(C)(C(=O)OC1CCCCC1)C	1.4809	1.5298	1.4608	1.5044	1.4531	1.4997	1.4784	1.5124	1.4581	1.4995	1.4357	1.4778	1.5065
OC(=O)c1ccccc1C(=O)OCC	1.549	1.6564	1.5361	1.5944	1.5264	1.589	1.5344	1.6157	1.5737	1.5636	1.486	1.5605	1.575
CC(C)(C(=O)Oc1ccc(cc1)C1CCCCCC1)	1.5722	1.6195	1.5372	1.5603	1.5149	1.5688	1.5464	1.5842	1.623	1.6033	1.5124	1.5646	1.5575
OCC(CC)CCCC	1.4567	1.4762	1.4193	1.4475	1.4066	1.4632	1.407	1.4708	1.4091	1.4424	1.4013	1.4318	1.4626
Cc1ccc(cc1)C	1.5974	1.6544	1.5976	1.6543	1.6145	1.6673	1.5779	1.6421	1.572	1.6673	1.5779	1.6242	1.669
C(C)(C(=O)NCCCC)C	1.4709	1.5267	1.4357	1.4972	1.4305	1.4931	1.4542	1.5331	1.4342	1.4846	1.4157	1.4565	1.5135

## Sheet: PA PT PB long 
# monomer units	α (PA) PBE0/DZ bohr^3	α (PT) PBE0/DZ bohr^3	α (PB) PBE0/DZ bohr^3
1	22.0849	48.6294	56.7014
2	45.6022	113.001	128.926
3	79.79	200.63	222.694
4	122.943	310.22	333.931
5	174.582	438.342	457.937
6	233.941	581.434	590.823
7	300.117	736.107	729.743
8	372.181	899.597	872.741
9	449.24	1069.68	1018.51
10	530.485	1244.69	1166.19
11	615.203	1423.36	1315.21
12	702.783	1604.79	1465.19
13	792.712	1788.28	1615.85
14	884.567	1973.35	1767.03
15	978	2159.62	1918.59
16	1072.72	2346.83	2070.44
17	1168.51	2534.76	2222.52
18	1265.18	2723.28	2374.79
19	1362.57	2912.25	2527.2
20	1460.56	3101.59	2679.72
21	1559.04	3291.24	2832.34
22	1657.95	3481.13	2985.04
23	1757.21	3671.23	3137.81
24	1856.76	3861.5	3290.64
25	1956.57	4051.92	3443.51
26	2056.59	4242.46	3596.42
27	2156.8	4433.1	3749.37
28	2257.16	4623.83	3902.35
29	2357.65	4814.64	4055.36
30	2458.26	5005.52	4208.39
31	2558.98	5196.46	4361.44
32	2659.78	5387.45	4514.52
33	2760.67	5578.49	4667.6
34	2861.62	5769.57	4820.71
35	2962.64	5960.68	4973.83
36	3063.71	6151.83	5126.96
37	3164.83	6343.01	5280.1
38	3265.99	6534.22	5433.25
39	3367.2	6725.45	5586.41
40	3468.44	6916.7	5739.58
41	3569.71	7107.98	5892.76
42	3671.01	7299.27	6045.95
43	3772.33	7490.58	6199.14
44	3873.68	7681.9	6352.34
45	3975.05	7873.24	6505.54
46	4076.44	8064.6	6658.75
47	4177.85	8255.96	6811.97
48	4279.27	8447.34	6965.18
49	4380.71	8638.73	7118.41
50	4482.17	8830.13	7271.63

## Sheet: PE
method / # monomers units	1	2	3	4	5	6	7	8	9	10	11
BP86/DZ	24.8885	48.2932	71.9961	96.0459	120.303	144.689	169.149	193.657	218.184	242.742	267.317
BP86/TZ	28.5471	54.4071	80.3966	106.807	133.452	160.25	187.136	214.083	241.047	268.058	295.086
B3LYP/DZ	24.5293	47.2809	70.2768	93.584	117.077	140.678	164.347	188.056	211.781	235.535	259.303
B3LYP/TZ	27.9866	53.0197	78.1634	103.66	129.378	155.226	181.153	207.132	233.133	259.167	285.218
PBE0/DZ	24.3913	47.0173	69.9005	93.102	116.491	139.99	163.555	187.161	210.785	234.436	258.101
PBE0/TZ	27.7067	52.5696	77.5897	102.973	128.581	154.321	180.142	206.016	231.913	257.842	283.79
TPSSh/DZ	24.5147	47.2736	70.3237	93.7056	117.285	140.978	164.74	188.548	212.372	236.225	260.092
TPSSh/TZ	27.796	52.804	78.0122	103.602	129.429	155.395	181.446	207.553	233.685	259.851	286.036
M06-2X/DZ	24.6555	47.4617	70.5043	93.8708	117.437	141.108	164.851	188.638	212.44	236.272	260.127
M06-2X/TZ	27.5691	52.2823	77.1583	102.424	127.919	153.55	179.266	205.036	230.83	256.658	282.504
B2PLYP/DZ	24.2244	46.3301	68.6342	91.2141	113.956	136.792	159.684	182.613	205.555	228.522	251.501
B2PLYP/TZ	27.3379	51.5274	75.818	100.426	125.234	150.152	175.138	200.171	225.21	250.302	275.383

## Sheet: PA
method / # monomers units	1	2	3	4	5	6	7	8	9	10	11
BP86/DZ	21.9504	48.9866	87.4053	139.945	208.823	296.091	403.68	533.439	687.164	866.564	1073.31
BP86/TZ	26.0627	56.0713	97.7114	153.901	226.852	318.644	431.218	566.454	726.141	912.036	1125.69
B3LYP/DZ	21.8219	48.4017	85.5878	135.584	200.078	280.56	378.376	494.749	630.874	787.737	966.331
B3LYP/TZ	25.794	55.2131	95.4979	149.009	217.423	302.265	404.889	526.567	668.431	831.552	1016.9
PBE0/DZ	21.7333	48.1601	84.9853	134.293	197.641	276.382	371.704	484.79	616.474	767.71	939.27
PBE0/TZ	25.5866	54.7034	94.4519	147.058	214.08	296.898	396.718	514.628	651.838	808.948	986.865
TPSSh/DZ	21.7799	48.444	85.9733	136.792	202.808	285.757	387.245	508.779	651.811	817.67	1007.65
TPSSh/TZ	25.6343	55.0018	95.4579	149.591	219.319	306.336	412.335	538.809	687.232	858.936	1054.9
M06-2X/DZ	21.829	47.7874	83.0512	129.101	186.81	256.833	339.625	435.442	544.462	666.722	802.478
M06-2X/TZ	25.4764	53.9851	91.9259	140.865	201.662	274.866	361	460.267	572.822	698.676	838.1
B2PLYP/DZ	21.861	48.1611	84.165	131.344	190.603	262.661	347.957	446.863	559.563	686.33	826.892
B2PLYP/TZ	25.6961	54.7214	93.7168	144.299	207.416	283.734	373.823	478.05	596.677	729.89	877.552

## Sheet: PT
PT type	method \ # monomers units	1	2	3	4	5	6	7	8	9	10
planar	BP86/DZ	52.3923	122.997	221.034	347.869	501.726	679.272	877.91	1093.11	1323.31	1563.82
planar	B3LYP/DZ	51.7092	119.78	211.433	326.114	460.67	610.988	774.35	946.775	1127.24	1312.32
planar	PBE0/DZ	51.6279	119.107	209.131	320.744	450.614	594.589	750.035	913.22	1083.26	1257.05
planar	TPSSh/DZ	51.9383	120.892	214.918	334.298	476.486	637.637	814.987	1004.27	1204.14	1410.66
planar	M06-2X/DZ	51.5652	116.754	200.094	299.139	409.884	528.834	653.9	782.59	914.971	1048.41
planar	B2PLYP/DZ	51.0984	116.228	200.551	301.965	416.694	540.801	672.179	807.92	947.664	1089.16
non-planar	BP86/DZ	52.3923	110.619	176.734	246.455	318.009	390.591	463.767	537.311	611.085	685.018
non-planar	B3LYP/DZ	51.7092	108.333	171.928	238.552	306.697	375.692	445.171	514.95	584.918	655.017
non-planar	PBE0/DZ	51.6279	108.106	171.44	237.746	305.538	374.158	443.251	512.636	582.205	651.901
non-planar	TPSSh/DZ	51.9383	109.226	173.86	241.759	311.304	381.769	452.762	524.079	595.612	667.27
non-planar	M06-2X/DZ	51.5652	107.348	169.453	234.214	300.303	367.129	434.371	501.885	569.553	637.332
non-planar	B2PLYP/DZ	51.0984	106.24	167.51	231.343	296.441	362.243	428.456	494.905	561.51	628.221

## Sheet: PB
PB type	method / # monomers units	1	2	3	4	5	6	7	8	9	10
planar	BP86/DZ	60.0659	135.635	232.854	347.322	474.199	609.534	750.482	895.133	1042.2	1191.17
planar	B3LYP/DZ	59.2962	132.053	222.862	326.675	438.986	556.622	677.571	800.602	924.939	1050.33
planar	PBE0/DZ	59.035	131.193	220.644	322.296	431.773	546.075	663.345	782.463	902.733	1023.94
planar	TPSSh/DZ	59.435	133.011	225.811	333.016	449.98	573.248	700.513	830.336	961.778	1094.52
planar	M06-2X/DZ	59.0483	129.201	213.531	306.904	405.629	507.445	611.087	715.838	821.268	927.25
planar	B2PLYP/DZ	58.5729	128.32	212.547	306.144	405.326	507.762	612.125	717.66	823.915	930.759
non-planar	BP86/DZ	60.0659	128.363	200.646	275.323	351.179	427.665	504.51	581.58	658.791	736.104
non-planar	B3LYP/DZ	59.2962	126.081	196.382	268.834	342.337	416.398	490.776	565.354	640.058	714.85
non-planar	PBE0/DZ	59.035	125.493	195.422	267.475	340.566	414.206	488.16	562.31	636.584	710.944
non-planar	TPSSh/DZ	59.435	126.682	197.603	270.761	345.018	419.858	495.03	570.407	645.922	721.523
non-planar	M06-2X/DZ	59.0483	125.095	194.393	265.71	338.007	410.824	483.935	557.233	630.646	704.143
non-planar	B2PLYP/DZ	58.5729	123.908	192.338	262.707	334.015	405.819	477.904	550.166	622.54	694.993
