# Supplementary figures and images for: Benchmarking DFT approaches for the calculation of polarizability inputs for refractive index predictions in organic polymers
Source: Royal Society of Chemistry journal article supplement (doi:10.1039/c8cp05492d), 2019-01-01

### PB (planar)

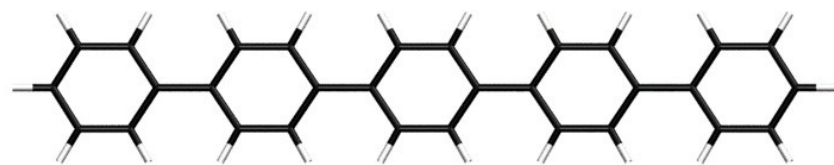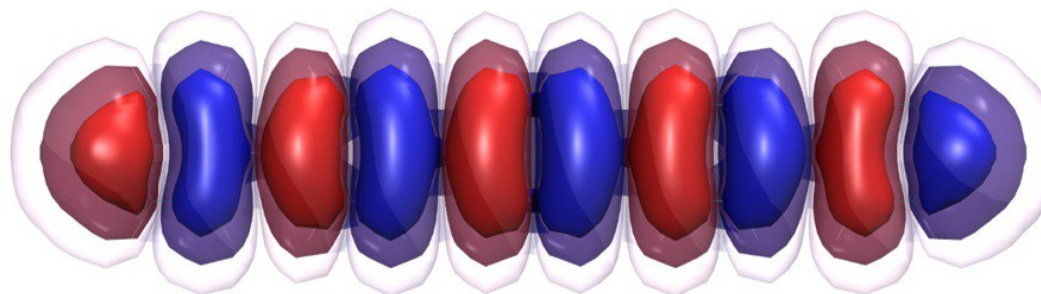

### PB (non-planar)

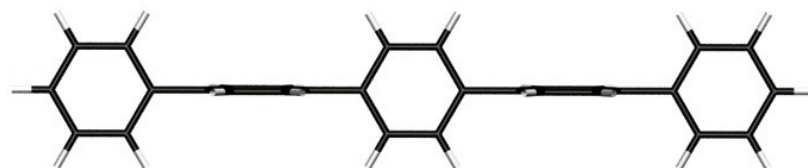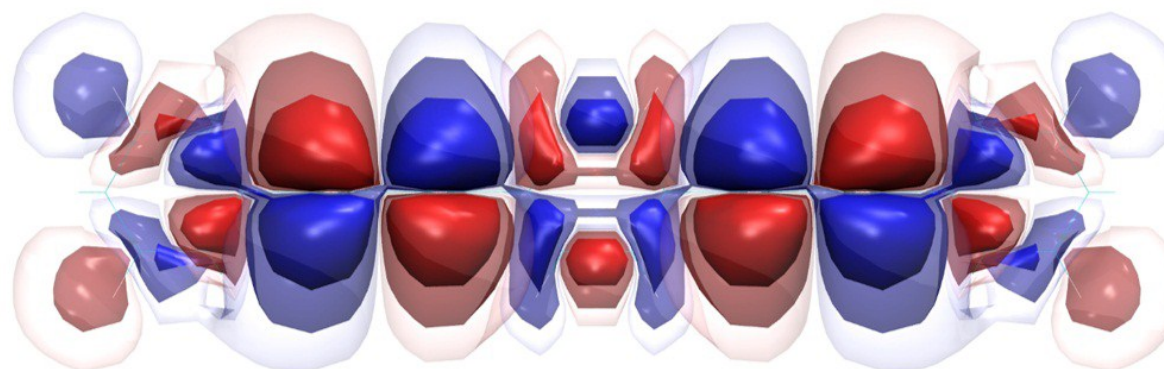

### PT (planar)

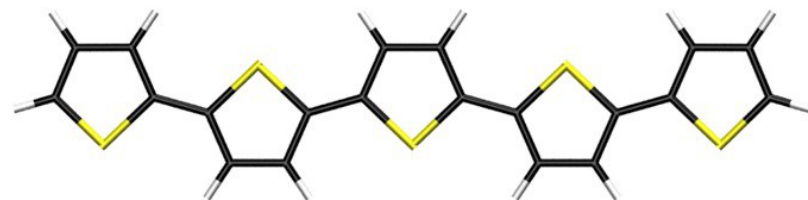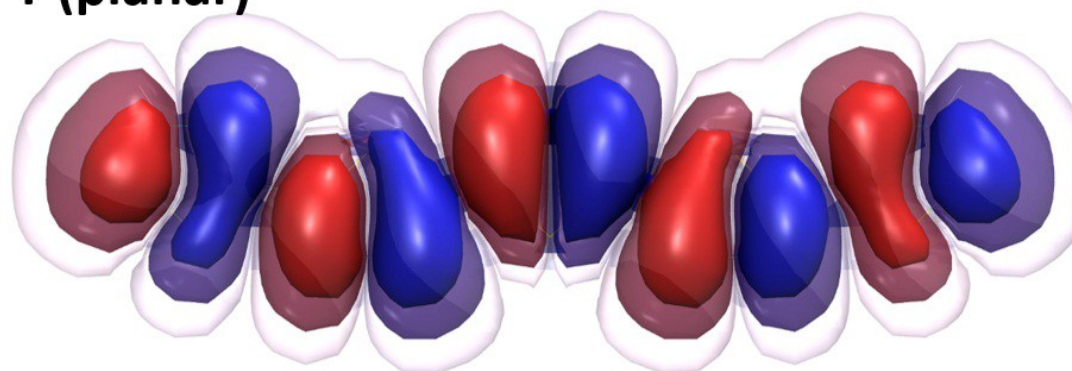

### PT (non-planar)

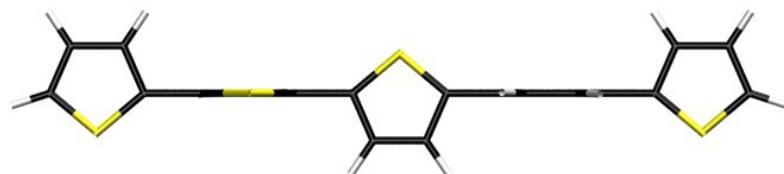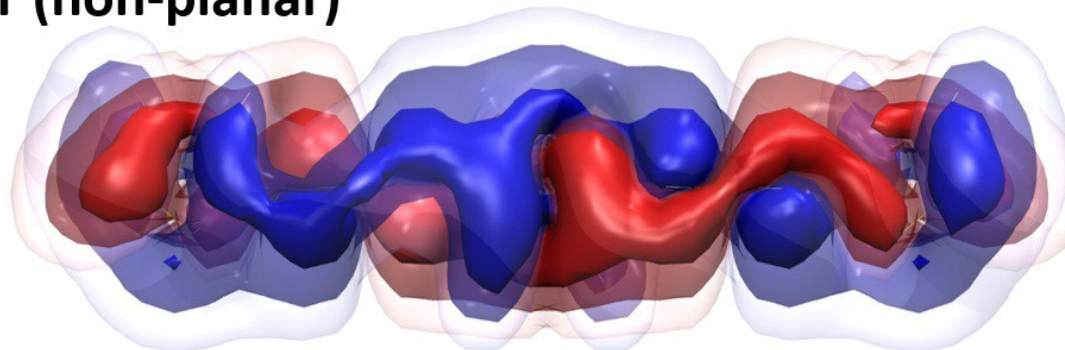

Supplement: c8cp05492d2.pdf [file c8cp05492d2.pdf]
